# Supplementary material
Source: publisher figshare collection journal article supplement (https://karger.figshare.com/ndownloader/files/28376907)
Supplement: Supplementary file 1 [file 28376907]

| **Author / title** | **inclusion** | **comment** | **number of patient / contacts** | **timing from surgery (months)** | **motor assessment** | **medication during assessment** | **STN boundaries relative to contact i.e Analysis of anatomical location** | **automatized or manual** | **normalisation** | **if Atlas, registration (rigid/elastic)** | **electrode localization** | **automatized or manual** | **comparison** | **outcome** | **Best location** |
| --- | --- | --- | --- | --- | --- | --- | --- | --- | --- | --- | --- | --- | --- | --- | --- |
| **Starr et al. J Neurosurg. 2002** | 0 | no STN segmentation, results expressed in coordinate, contact location expressed in relation to RN but only within an axial plan, 4mm below ACPC plan, total UPDRS-III with bilateral stimulation, insufficient outcomes data for a statistical correlation of lead location with clinical benefit | 44 / 76 | 3 for unilateral and 12 for bilateral DBS | total UPDRS-III | OFF medication | No STN segmentation, | manual | no normalization, but use of red nucleus-based coordinates in axial plane to account for anatomical variability in spatial positions of targeted nuclei with respect to the AC and PC | N/A | MRI | manual, realignment according to ACPC plan, but no co-registration between pre and post-operative imaging | description / average contact location | Mean improvement of UPDRS-III 45% for bilateral and 23.3% for unilateral stimulation (compared with pre-operative OFF medication) | **Insufficient outcomes data for a statistical correlation** |
| **Saint-Cyr et al. J Neurosurg. 2002** | 1 | no co-registration, active contacts plotted using ACPC length corrected coordinates | 29 / 54 | 3 to 6 | contralateral UPDRS-III | OFF medication | MER and atlas | manual | normalized to ACPC length in SWA (23mm) | no co-registration, active contacts plotted using ACPC length corrected coordinates | MRI | manual | description / spatial distribution of contact | Median UPDRS-III reduction around 50% (compared with pre-operative OFF medication, results obtained from Plaha et al 2006.) | **Antero-superior sector of the STN and the dorsally adjacent FF and ZI.** |
| **Cintas et al. Stereotact Funct Neurosurg. 2003** | 1 | distances reported for each individual using individual MER based STN dorsal limit | 20 / 39 | 3 months and 6 months, screening performed at 3 months | total and lateralized UPDRS-III | reported ON medication but most effective contact determined using UPDRS-III OFF medication | MER | manual | no normalisation, distances reported for each individual using individual MER based STN dorsal limit | N/A | fluoroscopy and MRI | manual | description / average contact location | Mean reduction of LEDD 57.3% | **above the electrophysiology defined STN borderzone (on average 1.8mm)** |
| **Hamel et al. J Neurol Neurosurg Psychiatry. 2003** | 0 | total UPDRS-III with bilateral stimulation, includes X ray-based lead localisation of the lead | 25 / 49 | 3 | total UPDRS-III | ON and OFF | MER and MRI/Atlas | manual | Results mostly expressed using coordinates and MER based dorsal STN border. No clear normalization of coordinates, but contact position also expressed and pictured in relation to individual STN dorsal border (MER) for 37 contacts | for Atlas, adaptation of digitised SWA included into Neuro Navigation system to patient's MRI using AC, PC and midsagittal point | X rays or MRI | manual marking of contacts on MRI using Neuro Navigation Software / semi-automatic for X rays with Neuroplan software, see Hamel et al. Zentralbl Neurochir 2002; 63: 65 ± 69 | description / average contact location | Mean UPDRS-III reduction 55% of improvement at 12 months (estimated from the graph, between pre-operative OFF medication UPDRS-III and post-operative OFF medication ON stimulation condition) | **Above (38%) or at the dorsal margin of the STN (32%)** |
| **Zonenshayn et al. Surg Neurol. 2004** | 1 | total UPDRS-III with bilateral stimulation | 33 / 63 | 6-18 | total UPDRS-III | OFF medication | MER | manual | Contact position described in comparison to each individual dorsal and ventral STN boundaries. no clear normalization for MCP based coordinates. | N/A | fluoroscopy | manual | description / average contact | Mean improvement of UPDRS-III 64% +/- 18% / 72% when contact within the STN (compared with pre-operative OFF medication) | **dorsal STN border (on average on average, 0.1+/-2.1 mm dorsal to it)** |
| **Kitagawa et al. Neurosurgery. 2005** | 0 | insufficient number of patients, ZI purposely targeted | 8 / 8 | 6-24 | total UPDRS-III and contralateral rigidity, tremor and bradykinesia sub-scores | OFF medication | MRI and atlas | manual | SWA superimposed onto the MRI/CT fused images with the aid of AtlasPlan software (Radionics, Burlington, MA) | Co-registration process not described | CT scan | manual | description after targeting Zi | Mean reduction of UPDRS-III 44,3%+/- 14.1 and reduction of contralateral tremor 78.3 % +/-35.8 (comparison with post-operative OFF medication OFF stimulation at follow up) | **Sub-thalamic white matter including the ZI/PRL is effective** |
| **Caire F et al. Neurochirurgie. 2006** | 0 | manual STN segmentation, total UPDRS-III with bilateral segmentation, insufficient number of patients, X ray-based localisation | 10 / 20 | 3 or 6 | total UPDRS-III | OFF medication - ON stimulation | STN boundaries based on MRI (manual segmentation based on Atlas guidance) | manual | contact position described in each individual patient, no normalisation | N/A | X rays | manual | descriptive study | Mean reduction of UPDRS-III 80,4% ± 2,6 (compared with post-operative score OFF medication and OFF stimulation) | **dorsal border and antero-supero-lateral STN** |
| **Godinho. et al J Neurol. 2006** | 0 | total UPDRS-III with bilateral stimulation, localisation of active contact relative to its corresponding STN dorsal border, X ray-based localisation | 28 / 56 | 6 | total UPDRS-III | OFF medication | MER | manual | Localisation of active contact relative to its corresponding STN dorsal border. For group representation, correction for ACPC length of the digitalised Morel Atlas | no co-registration but transposition of stereotactic coordinates onto common space and onto digitalised version of Morel atlas | X rays | manual | description / average contact location | Mean reduction of UPDRS-III 62.8% +/-8,5% OFF medication (compared with pre-operative OFF medication) | **around the dorsal border of the STN (± 1.5 mm)** |
| **Pollo et al. J Neurosurg. 2007** | 1 | total UPDRS-III with bilateral stimulation, best contact position and MER defined dorsal border of the STN along final lead trajectory | 31 / 62 | 14-42, mean 26.3 months | total UPDRS-III | OFF medication | MER | manual | Coordinates of MRI/MER defined target, best contact position and MER defined dorsal border of the STN along final lead trajectory. No clear normalisation | no co-registration, coordinates projected onto SWA | MRI | manual | description / average contact | Pre-operative UPDRS-III OFF medication: 46.27 +/- 13.89. UPDRS-III OFF medication ON stimulation 28.07 +/- 12.16 (39% reduction) | **dorsal margin of STN** |
| **Vergani et al. Surgical Neurology. 2007** | 1 | total UPDRS-III with bilateral stimulation, SWA superimposed to each individual imaging for individualised description | 25 / 50 | 6-36, mean 19.56 months | total UPDRS-III | OFF medication | Atlas | manual | Talairach grid used to normalize the SWA to the anatomy of every patient, no correction of individual coordinates | anatomical images of Schaltenbrand and Wharen superimposed, no further details than Talairach grid | MRI | manual | description / spatial distribution of contact | Mean improvement in UPDRS-III 62% (range, 20%-90%) from the pre-operative OFF medication to the post-operative OFF medication ON | **Majority of contact located either in ZI/FF (21/55), STN (20/55) or at the interface between those (12/55)** |
| **Zheng et al. Chinese Medical Journal. 2009** | 0 | motor scale and medication status not specified but descriptive study only | 34 / 40 | mean 12 months | not specified | not specified | MER | manual | MER defined dorsal border of the STN along final lead trajectory. No clear normalisation | N/A | MRI | manual | description / average contact | Not reported | **When compared with the average position of the dorsal margin of the STN, the active contacts were located dorsally and anteriorly from the average superior margin of the STN** |
| **Connolly et al. Journal of Clinical Neuroscience. (2012)** | 1 | motor scale and medication status not specified but descriptive study only, description of each active contact relative to the corresponding STN centre | 50 / 100 | >12 | not specified | not specified | MRI, STN space defined as a rectangular prism based on borders coordinates | manual | description of each active contact relative to the corresponding STN centre | N/A | MRI | manual | description / spatial distribution of contact from STN centre | Not reported | **all contact were in the STN, majority of contact in the posterolateral part** |
| **Guo et al. Parkinsonism and Related Disorders. 2012** | 0 | lateralised motor score, OFF meds assessment, MER defined dorsal border of the STN along final lead trajectory | 23 / 40 | >6, mean 15.8 months (SD 2.3) | lateralised tremor, rigidity, and bradykinesia sub-score from the UPDRS-III | OFF medication | MER | manual | MER defined dorsal border of the STN along final lead trajectory. No clear normalisation | N/A | MRI | manual | description of average location of active contact | Mean reduction of UPDRS-III sub-scores fro; pre-operative OFF medication condition: 76.8 +/- 31.1%, 61.9 +/- 26.3% and 59.0 +/- 23.2% for  tremor, rigidity, and bradykinesia after a mean follow-up of 15.8 +/- 2.3 months | **dorsal border of the STN** |
| **Vassal et al. Br J Neurosurg. 2019** | 0 | insufficient number of patients, total UPDRS-III, OFF meds assessment, localisation of active contact relative to its corresponding STN in each patient | 9 / 18 | 6 | total UPDRS-III | OFF medication - ON stimulation | MRI | manual | localisation of active contact relative to its corresponding STN in each patient, no clear normalisation for average coordinates | N/A | CT scan | manual | description of active contact location | Mean UPDRS-III reduction: 71% (mean OFF medication UPDRS-III pre-operatively and 33.8 ± 10.6; mean ON medication / ON stimulation score post-surgery 9.7 ± 2.4) | **inside dorsolateral STN 16/18, interface between the STN and the caudal zona incerta 2/18** |

Supplementary Table 3: active contact localisation studies before selection.
